# Supplementary material
Source: PubMed Central journal article supplement (PMC4500790)
Supplement: NIHMS667296-supplement-Supporting_Information_Figure_1.pdf [file NIHMS667296-supplement-Supporting_Information_Figure_1.pdf]

## Supporting Information Figure 1

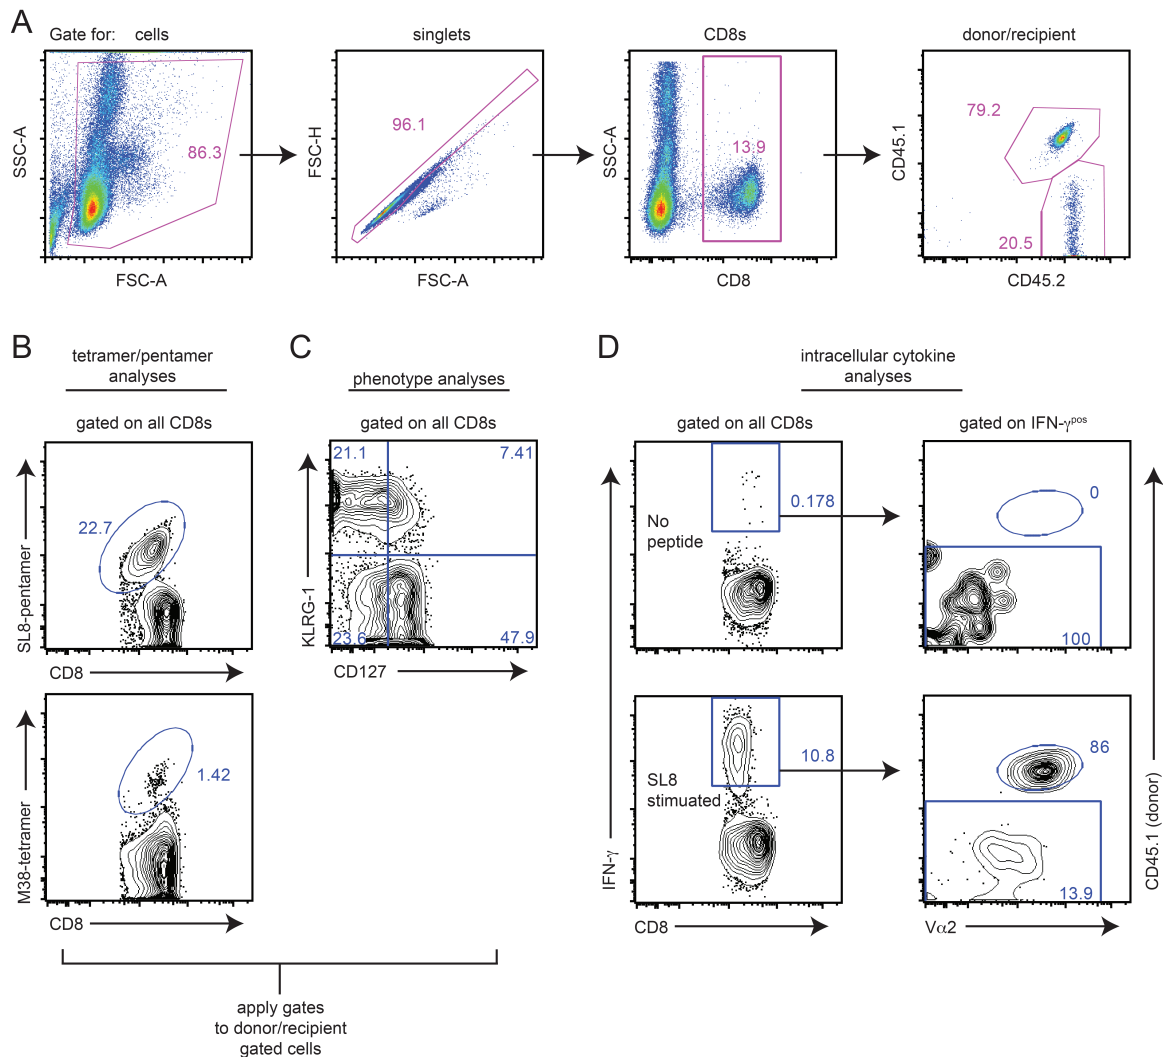

**Supporting Information Figure 1: Gating strategies.** A) In all cases, total cells and singlets were gated prior to selection of CD8<sup>+</sup> cells. After gating on CD8<sup>+</sup> cells, donor and host cells were discriminated as shown in the individual figures. An example is shown here. B) Pentamer<sup>+</sup> or tetramer<sup>+</sup> cells were gated on total CD8<sup>+</sup> T cell populations, prior to discrimination of donor and host cells. Shown is an example of SL8-pentamer (top) and M38-tetramer (bottom) staining. C) For phenotypic analyses shown in Figure 2, cross-hair gates were set on total CD8<sup>+</sup> T cell populations and then applied to donor and recipient pentamer<sup>+</sup> populations. D) For intracellular cytokine staining, IFN- $\gamma$ <sup>+</sup> cells were gated within CD8<sup>+</sup> T cells. Both stimulated and unstimulated populations were assessed for each animal. Gates were set so that IFN- $\gamma$ <sup>+</sup> populations were less than 0.2% of the unstimulated CD8<sup>+</sup> cells and then applied to stimulated populations. Because membrane sharing during stimulation can lead to CD45 ambiguity [41], we discriminated donor cells by both differential CD45 expression and V $\alpha$ 2 expression as shown.
